# Supplementary material
Source: PubMed Central journal article supplement (PMC8757638)

**a** ■ spliced ■ unspliced

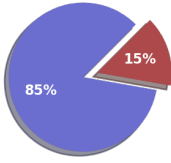

■ spliced ■ unspliced

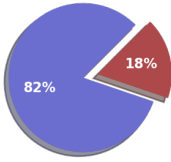

**b** CellRank CFLARE Terminal States (2d)

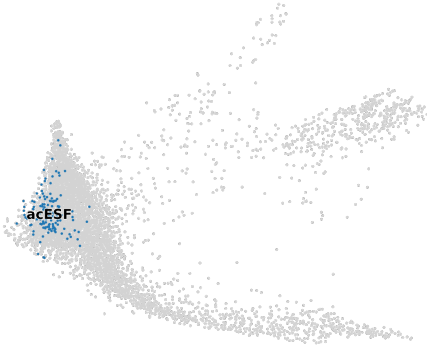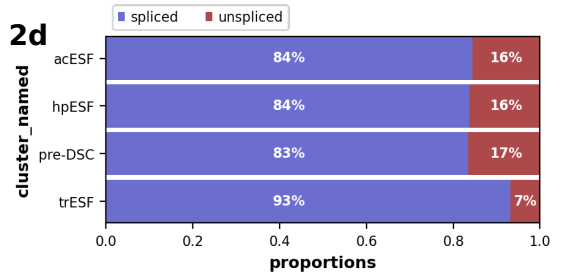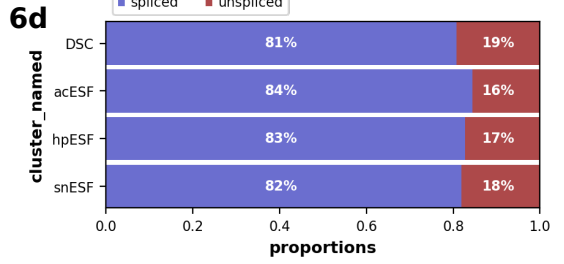

CellRank CFLARE Terminal States (6d)

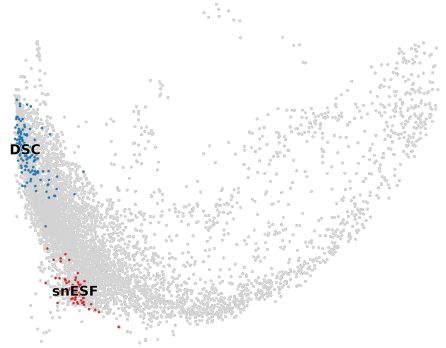

Supplement: figures7_ioab183.pdf [file figures7_ioab183.pdf]
