# Supplementary material
Source: PubMed Central journal article supplement (PMC8757638)
Supplement: supplementary_table_s1_ioab183.pdf [file supplementary_table_s1_ioab183.pdf]

| Species    | PGE <sub>2</sub> at attachment | PGE <sub>2</sub> at parturition | Forms Decidua | References |
|------------|--------------------------------|---------------------------------|---------------|------------|
| Quail      | N/A                            | Yes                             | No            | [1]        |
| Opossum    | Yes                            | Yes                             | No            | [2,3]      |
| Armadillo  | Yes                            | ?                               | Yes           | [4,5]      |
| Pig        | Yes                            | ?                               | Yes           | [6,7]      |
| Dog        | Yes                            | Yes                             | Yes           | [8,9]      |
| Horse      | Yes                            | Yes                             | Yes           | [10,11]    |
| Guinea Pig | No                             | Yes                             | Yes           | [12,13]    |
| Mouse      | Yes                            | Yes                             | Yes           | [14,15]    |
| Human      | Yes                            | Yes                             | Spontaneous   | [16,17]    |

#### Data References

- Hertelendy F. Effects of prostaglandins, cyclic AMP, seminal plasma, indomethacin, and other factors on oviposition in the Japanese quail, *Coturnix coturnix Japonica*. *J Reprod Fertil* 1974; 40:87–93.
- Griffith OW, Chavan AR, Protopapas S, Maziarz J, Romero R, Wagner GP. Embryo implantation evolved from an ancestral inflammatory attachment reaction. *Proc Natl Acad Sci USA* 2017; 2017:E6566–E6575.
- Erkenbrack EM, Maziarz JD, Griffith OW, Liang C, Chavan AR, Nnamani MC, Wagner GP. The mammalian decidua cell evolved from a cellular stress response. *PLoS Biol* 2018; 16:e2005594.
- Chavan AR, Wagner GP. The fetal-maternal interface of the nine-banded armadillo: endothelial cells of maternal sinus are partially replaced by trophoblast. *Zool Lett* 2016; 2:11.
- Chavan AR, Griffith OW, Stadtmayer DJ, Maziarz J, Pavičev M, Fishman R, Koren L, Romero R, Wagner GP. Evolution of embryo implantation was enabled by the origin of decidua cells in eutherian mammals. *Mol Biol Evol* 2021; 38:1060–1074.
- Wilson ME, Fahrenkrug SC, Smith TPL, Rohrer GA, Ford SP. Differential expression of cyclooxygenase-2 around the time of elongation in the pig conceptus. *Anim Reprod Sci* 2002; 71:229–237.
- Waclawik A, Kaczmarek MM, Blitek A, Kaczynski P, Ziecik AJ. Embryo-maternal dialogue during pregnancy and implantation in the pig. *Mol Reprod Dev* 2017; 84:842–855.
- Gram A, Fox B, Büchler U, Boos A, Hoffmann B, Kowalewski MP. Canine placental prostaglandin E2 synthase: expression, localization, and biological functions in providing substrates for prepartum PGF2alpha synthesis. *Biol Reprod* 2014; 91:154.
- Kautz E, Gram A, Aslan S, Ay SS, Selçuk M, Kanca H, Koldaş E, Akal E, Karakaş K, Findik M, Boos A, Kowalewski MP. Expression of genes involved in the embryo-maternal interaction in the early-pregnant canine uterus. *Reproduction* 2014; 147:703–717.
- Watson ED, Sertich PL. Prostaglandin production by horse embryos and the effect of co-culture of embryos with endometrium from pregnant mares. *J Reprod Fertil* 1989; 87:331–336.
- Bauersachs S, Wolf E. Transcriptome analyses of bovine, porcine, and equine endometrium during the pre-implantation phase. *Animal Reprod Sci* 2012; 134:84–94.
- Poyser NL. Prostaglandin production by the early pregnant guinea-pig uterus in relation to implantation and luteal maintenance, and the effect of oestradiol. *J Reprod Fertil* 1984; 72:117–127.
- Rajabi MR, Cybulski AV. Phospholipase A2 activity is increased in guinea pig uterine cervix in late pregnancy and at parturition. *Am J Physiol Endocrinol Metab* 1995; 269:E940–E947.
- Holmes PV, Gordashko BJ. Evidence of prostaglandin involvement in blastocyst implantation. *J Embryol Exp Morphol* 1980; 55:109–122.
- Kimura T, Ogita K, Kusui C, Ohashi K, Azuma C, Murata Y. What knockout mice can tell us about parturition. *Rev Reprod* 1999; 4:73–80.
- Holmes PV, Sjögren A, Hamberger L. Prostaglandin-E2 released by pre-implantation human conceptuses. *J Reprod Immunol* 1990; 17:79–86.
- Sangha RK, Walton JC, Ensor CM, Tai H-H, Challis JRG. Immunohistochemical localization, messenger ribonucleic acid abundance, and activity of 15-hydroxyprostaglandin dehydrogenase in placenta and fetal membranes during term and preterm labor. *J Clin Endocrinol Metab* 1994; 78:982–989.
