# Supplementary material
Source: PubMed Central journal article supplement (PMC8757638)

**a****Cluster dendrogram with p-values (%)**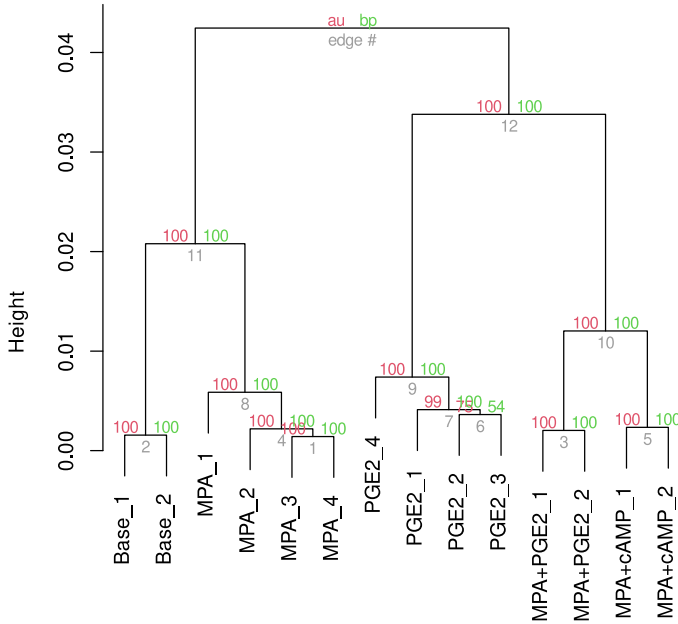**b**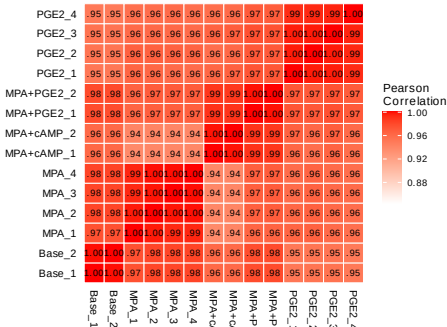**c**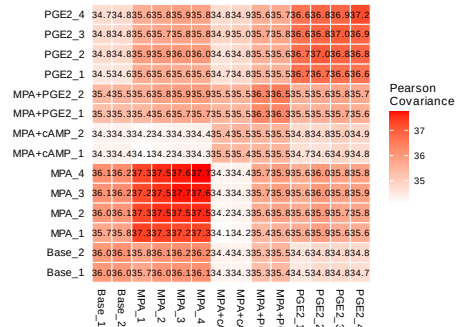**d**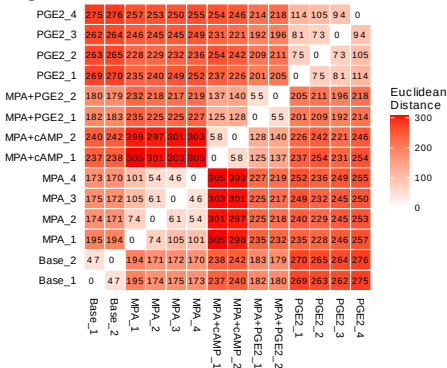**e**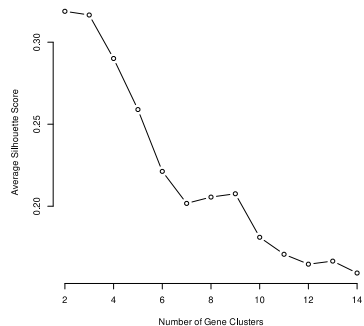

Supplement: figures1_ioab183.pdf [file figures1_ioab183.pdf]

**a****Library Size**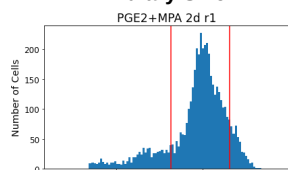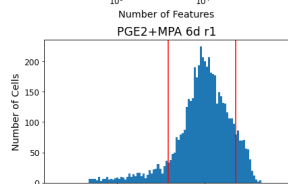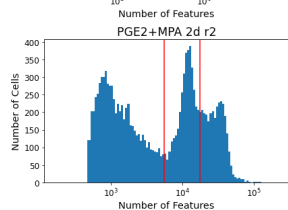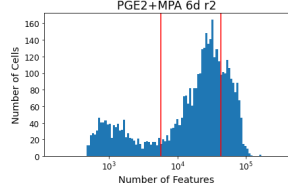**b****% Mitochondrial**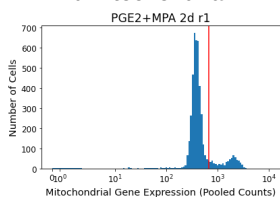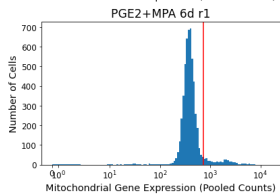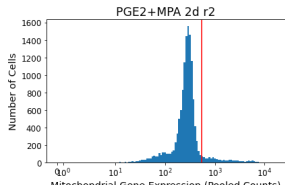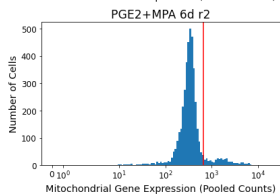**c****Gene Capture**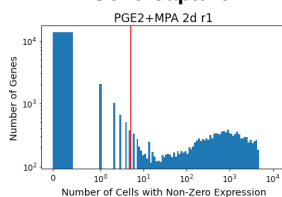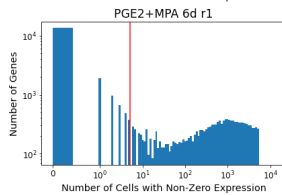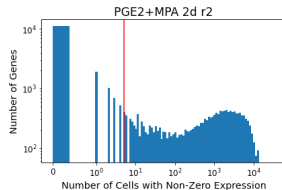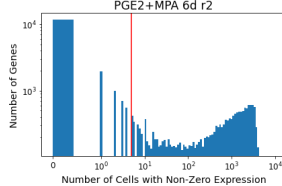

Supplement: figures2_ioab183.pdf [file figures2_ioab183.pdf]

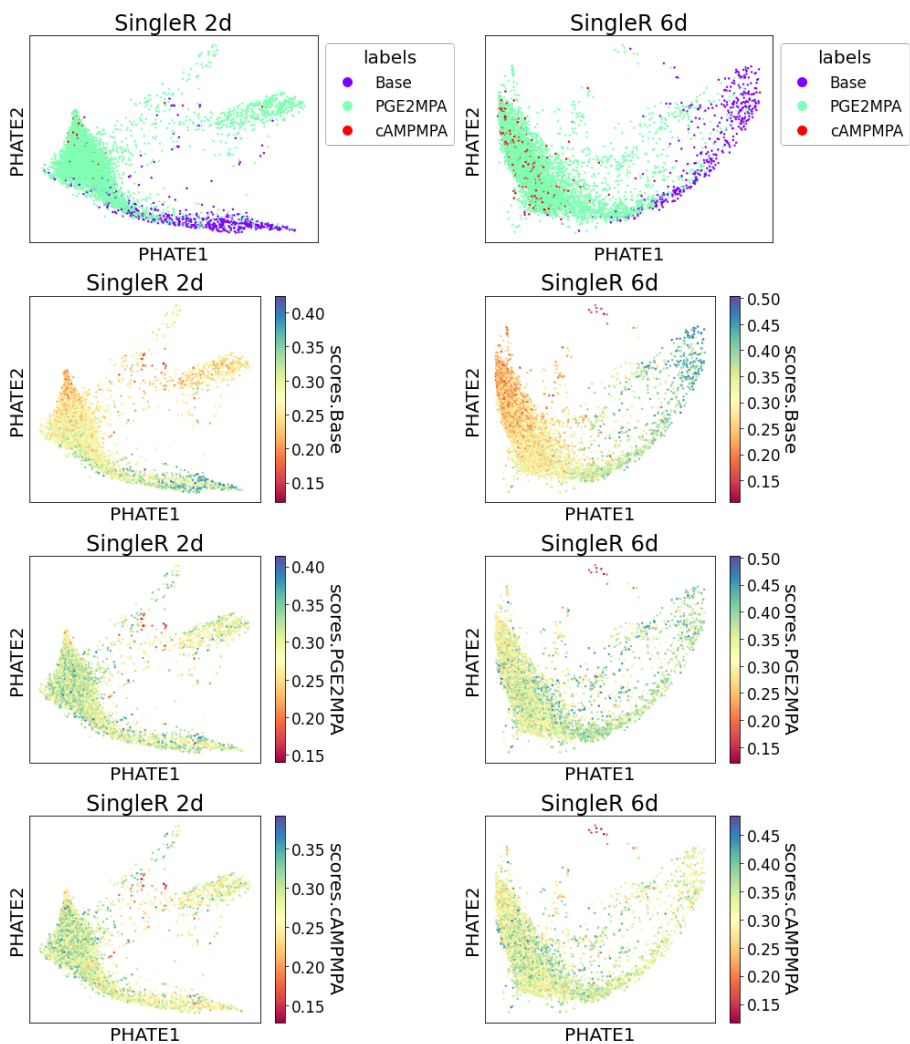

Supplement: figures3_ioab183.pdf [file figures3_ioab183.pdf]

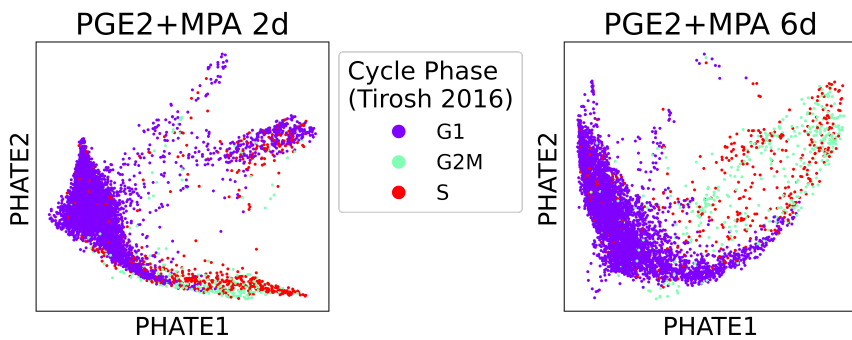

Supplement: figures4_ioab183.pdf [file figures4_ioab183.pdf]

**a**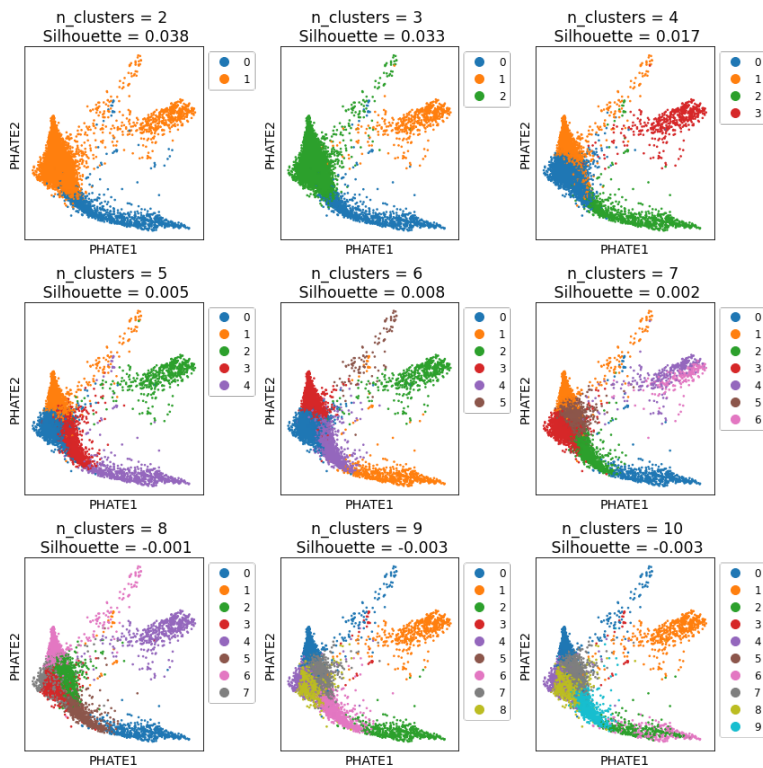**b**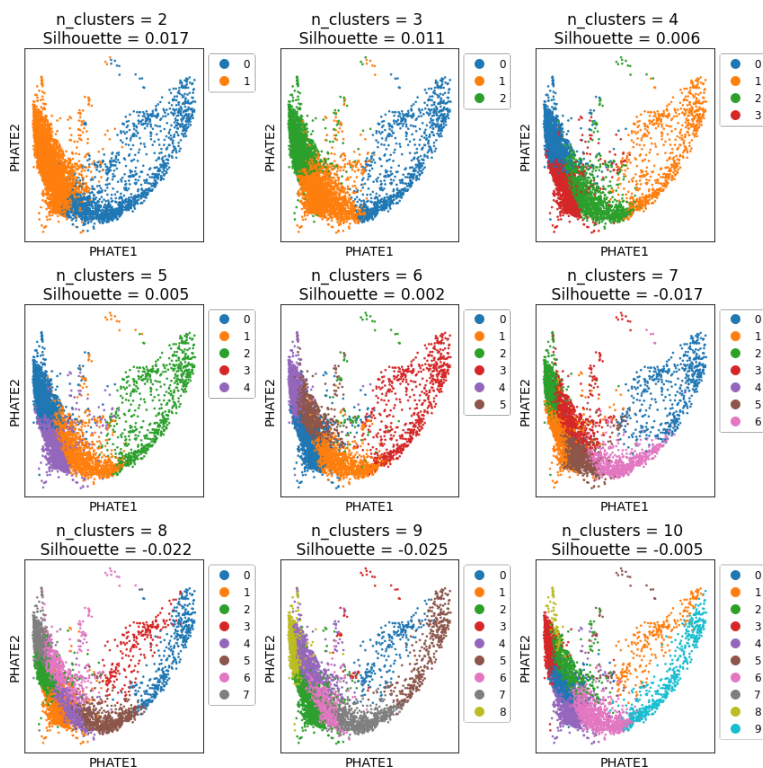

Supplement: figures5_ioab183.pdf [file figures5_ioab183.pdf]

**a**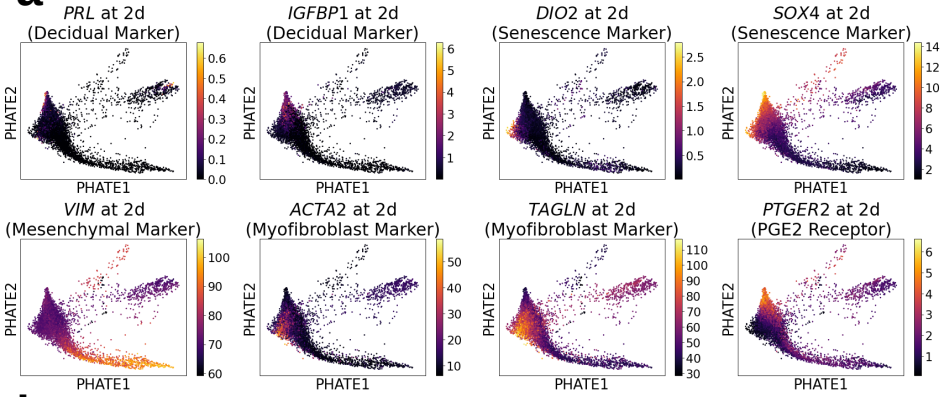**b**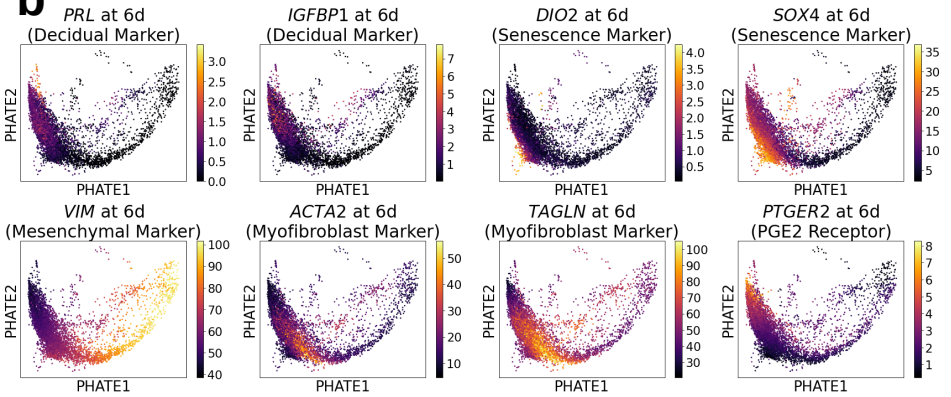

Supplement: figures6_ioab183.pdf [file figures6_ioab183.pdf]

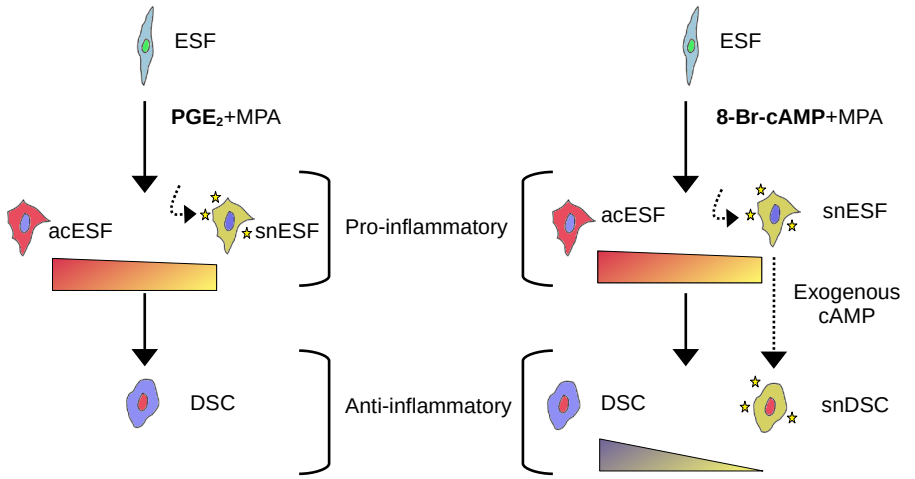

Supplement: figures8_ioab183.pdf [file figures8_ioab183.pdf]
